# Supplementary material for: Cardiac Signatures of Personality
Source: PLOS journal article supplement (doi:10.1371/journal.pone.0031441), 2012-02-21
Supplement: S2 (10.1371/journal.pone.0031441.s002) [file journal.pone.0031441.s002]

|                                      |                    |
|--------------------------------------|--------------------|
| <b>(a) Agreeableness</b>             |                    |
| <i>(Constant)</i>                    | 129.28984          |
| <b>Wave<sub>lead</sub></b>           | <b>coefficient</b> |
| Height (cm)                          | -0.19594           |
| <i>RS<sub>avR</sub></i>              | 0.01943            |
| <i>RS<sub>V6</sub></i>               | -0.00889           |
| <i>P<sub>V4</sub></i>                | 0.27464            |
| <i>P<sub>V5</sub></i>                | -0.07347           |
| <i>P<sub>V3</sub></i>                | -0.12404           |
| <b>(b) Agreeableness (corrected)</b> |                    |
| <i>(Constant)</i>                    | -10.30131          |
| <b>Wave<sub>lead</sub></b>           | <b>coefficient</b> |
| <i>RS<sub>avR</sub></i>              | 0.01952            |
| <i>RS<sub>V6</sub></i>               | -0.00898           |
| <i>P<sub>V4</sub></i>                | 0.27189            |
| <i>P<sub>V5</sub></i>                | -0.07010           |
| <i>P<sub>V3</sub></i>                | -0.12432           |
| <b>(c) Positive emotion</b>          |                    |
| <i>(Constant)</i>                    | 45.31564           |
| <b>Wave<sub>lead</sub></b>           | <b>coefficient</b> |
| <i>T<sub>RI</sub></i>                | 0.01861            |
| <i>T<sub>V2</sub></i>                | -0.00781           |
| <i>RS<sub>V2</sub></i>               | 0.00170            |

Regression models. (a) Model resulting from stepwise linear regressions with absolute values of all ECG amplitude waves (see Methods), as well as body height, weight, and BMI, as independent (predictor) variables, and agreeableness (standard scores) as dependent variable. Note that this regression model included body height as a predictor variable (due to a significant correlation between body height and agreeableness in our sample, see main text). To remove this contribution of body height to the explanation of agreeableness with ECG waves, the residuals of a linear regression with agreeableness as dependent variable, and body height as independent variable were used for a stepwise regression with the ECG amplitude values (as well as height, weight, and BMI) as independent variables. (b) shows the model of resulting from this regression (in which the explanation of agreeableness by means of ECG amplitude values is corrected for body height). (c) Model resulting from stepwise linear regressions with absolute values of all ECG amplitude waves (see Methods), as well as body height, weight, and BMI, as independent (predictor) variables, and positive emotion (T-scores) as dependent variable. Abbreviations of ECG waves as in Supplementary Table 1.
