# Supplementary material for: Cardiac Signatures of Personality
Source: PLOS journal article supplement (doi:10.1371/journal.pone.0031441), 2012-02-21
Supplement: S4 (10.1371/journal.pone.0031441.s004) [file journal.pone.0031441.s004]

| Item                                                    | effect size |
|---------------------------------------------------------|-------------|
| I don't consider myself especially "light-hearted". (+) | .24         |
| I am not a cheerful optimist (+)                        | .23         |
| I often feel tense and jittery (-)                      | .23         |
| Sometimes I bubble with happiness (+)                   | .22         |
| I rarely feel lonely or blue (-)                        | .21         |
| I am a cheerful, high-spirited person (+)               | .21         |

Items for which the scores between the two  $E_{\kappa}$  groups ( $E_{\kappa}$  values above and below the median of  $E_{\kappa}$  values) differed with effect sizes of Cohen's  $d \geq .2$ . A plus sign indicates that scores were higher ("agree") for individuals with lower  $E_{\kappa}$  values, the minus sign indicates that scores were lower ("disagree") for individuals with lower  $E_{\kappa}$  values. For example, individuals with lower  $E_{\kappa}$  values had higher scores agreeing to the statement of not being a cheerful optimist. Cohen's  $d$  was computed using Hedges' bias correction. When comparing the scores of these items between groups using two-samples  $t$ -tests,  $p$ -values were  $< .05$  in each of the tests.
